# Supplementary material for: Re-Emergence of Dengue Serotype 3 in the Context of a Large Religious Gathering Event in Touba, Senegal
Source: MDPI journal article supplement (doi:10.3390/ijerph192416912), 2022-12-16
Supplement: s1 [file s1]

# Re-emergence of Dengue serotype 3 in the context of a large religious gathering event in Touba City, Senegal

Idrissa DIENG <sup>1\*</sup>, Cheikh Fall<sup>1</sup>, Mamadou Aliou Barry<sup>2</sup>, Aboubacry Gaye<sup>2</sup>, Ndongo Dia<sup>3</sup>, Marie Henriette Dior Ndione<sup>1</sup>, Amary Fall<sup>3</sup>, Mamadou Diop<sup>2</sup>, Fatoumata Diene Sarr<sup>3</sup>, Oumar Ndiaye<sup>1</sup>, Mamadou Dieng<sup>4</sup>, Boly Diop<sup>4</sup>, Cheikh Tidiane Diagne<sup>1</sup>, Mamadou Ndiaye<sup>4</sup>, Gamou Fall<sup>1</sup>, Mbacké Sylla<sup>4</sup>, Ousmane Faye<sup>1</sup>, Cheikh Loucoubar<sup>2</sup>, Oumar Faye<sup>1</sup> and Amadou Alpha Sall <sup>1</sup>

<sup>1</sup> Arboviruses and Haemorrhagic Fever Viruses Unit, Virology Department, Institut Pasteur de Dakar, Dakar, Senegal

<sup>2</sup> Epidemiology, Clinical Research and Data Science Department, Institut Pasteur de Dakar, Dakar, Senegal

<sup>3</sup> Respiratory viruses Unit, , Virology Department, Institut Pasteur de Dakar, Dakar, Senegal

<sup>4</sup> Ministry of Health, Dakar, Senegal

\* Correspondence: [Idrissa.DIENG@pasteur.sn](mailto:Idrissa.DIENG@pasteur.sn) ; +221 761912447

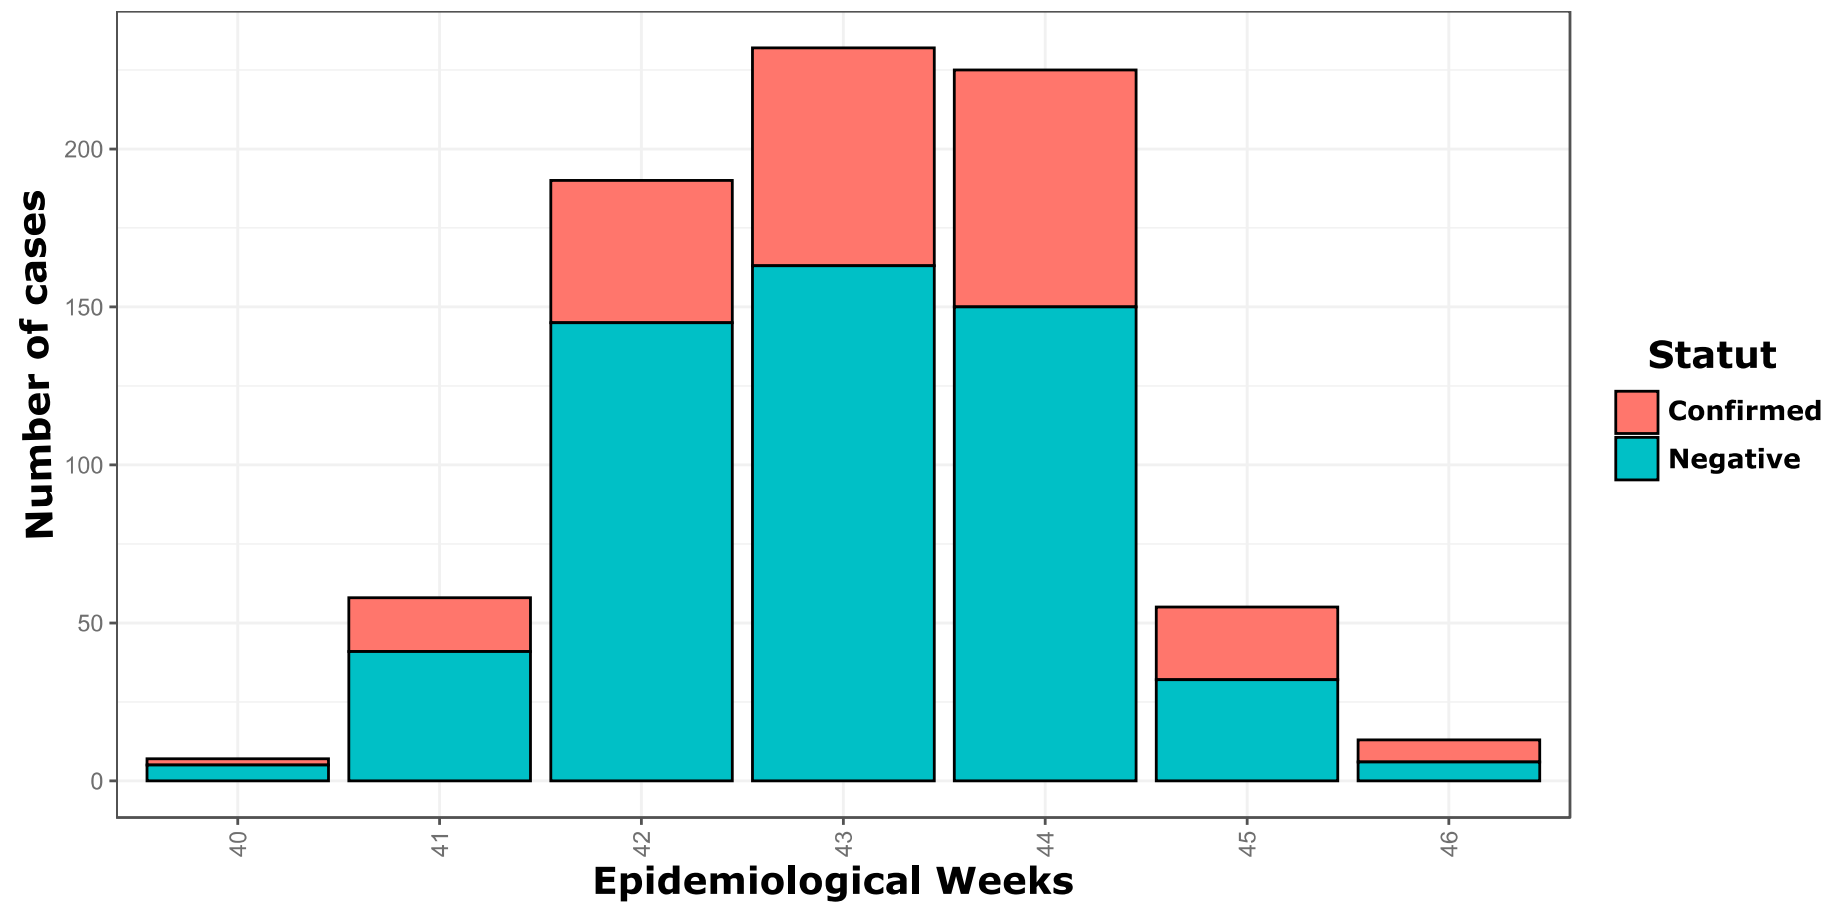

**Figure S1 :** Distribution of suspected and confirmed DENV human cases according to epidemiological weeks in Touba City, 2018.
